# Supplementary material
Source: publisher figshare collection journal article supplement (https://karger.figshare.com/ndownloader/files/15792143)
Supplement: Supplementary file 1 [file 15792143]

## Supplementary Material A

Table 1. Independent and relational analyses for 12 children with CAS based on transcription of 50 utterances

| Analysis                      | Participant |     |     |     |     |     |     |     |     |     |     |     |
|-------------------------------|-------------|-----|-----|-----|-----|-----|-----|-----|-----|-----|-----|-----|
|                               | 1           | 2   | 3   | 4   | 5   | 6   | 7   | 8   | 9   | 10  | 11  | 12  |
| <b>Independent Analyses</b>   |             |     |     |     |     |     |     |     |     |     |     |     |
| Phoneme inventory             | 39          | 40  | 38  | 36  | 37  | 40  | 41  | 41  | 37  | 37  | 25  | 32  |
| No. syllables/ string         | 4.7         | 3.7 | 3.8 | 3.4 | 4.4 | 3.7 | 5.0 | 5.9 | 3.2 | 3.2 | 1.1 | 2.2 |
| Incidences of inter-word seg. | 15          | 10  | 67  | 22  | 5   | 54  | 56  | 11  | 25  | 26  | -   | -   |
| Incidences of juncture        | 11          | 3   | 1   | 9   | 12  | 1   | 12  | 15  | 5   | 0   | -   | -   |
| <b>Relational Analyses</b>    |             |     |     |     |     |     |     |     |     |     |     |     |
| PCC (%)                       | 87          | 91  | 69  | 87  | 83  | 85  | 82  | 87  | 79  | 55  | -   | -   |
| PVC (%)                       | 93          | 91  | 81  | 94  | 91  | 91  | 94  | 92  | 89  | 63  | -   | -   |
| Speech string accuracy (%)    | 32          | 33  | 13  | 38  | 28  | 22  | 31  | 23  | 24  | 8   | -   | -   |
| Syllable stress accuracy (%)  | 45          | 44  | 30  | 55  | 53  | 35  | 56  | 32  | 39  | 10  | -   | -   |

Note. ‘-’ indicates measure was unable to be calculated due to the participants’ poor intelligibility; Incidences of inter-word seg. = incidences of inter-word segregation; PCC = Percentage of Consonants Correct; PVC = Percentage of Vowels Correct
